# Supplementary material
Source: publisher site journal article supplement (doi:10.18632/aging.202643)
Supplement: Supplementary file 3 [file aging-v13-202643-supplementary-material-SD2.pdf]

## SUPPLEMENTARY TABLES

**Supplementary Table 1. PCR primer.**

|               |   |                                                                                                               |
|---------------|---|---------------------------------------------------------------------------------------------------------------|
| U6            |   | GTGCTCGCTTCGGCAGCACATATACTAAAATTGGAACGATACAGAGAAGATTAG<br>CATGGCCCCTGCGCAAGGATGACACGCAAATTCGTGAAGCGTTCATATTTT |
| mmu-miR-128-2 |   | GGGGGCCGAUGCACUGUAAGAGA                                                                                       |
| mmu-miR-128-1 |   | CGGGGCCGUAGCACUGUCUGA                                                                                         |
| GAPDH         | F | TCCTGCACCACCAACTGCTTAG                                                                                        |
|               | R | AGTGGCAGTGATGGCATGGACT                                                                                        |
| p38a-F        | F | GCCCAGAAGGAGGCAGACT                                                                                           |
|               | R | TGGGATGGCATGGAGTTGA                                                                                           |
| AKT           | F | GGGTCCAGGGCCAAAGTC                                                                                            |
|               | R | GAGAGGGCCAGTTAGCATACCA                                                                                        |
| M-CSF         | F | TGCTGAGTCCCCCTTTCCT                                                                                           |
|               | R | GACCACTCTCCTCCCAGATTCAT                                                                                       |
| Caspase-3     | F | GCTCCTGGCCTCCTTATGG                                                                                           |
|               | R | TGTGAGTTCCTTCCTTTCTTTGTG                                                                                      |
| Bax           | F | CCCCACATGGCAGACA                                                                                              |
|               | R | CCTCAGCCCATCTTCTTCCA                                                                                          |
| Bcl-2         | F | AGGCATGAAGAAAACCAGGTAGAG                                                                                      |
|               | R | GGACTTGGTGCATGGAACACT                                                                                         |
| TNF- $\alpha$ | F | AGCACAAGGCTGAGATTCTCGC                                                                                        |
|               | R | CTCGTTCAGTCTCCAGCTTCTG                                                                                        |
| IL-6          | F | CGCTATGAAGTTCCTCTCTGCAA                                                                                       |
|               | R | TAGGGAAGGCCGTGGTTGT                                                                                           |
| IL-8          | F | TACTAGCCTGCATCAGCATGG                                                                                         |
|               | R | TGGCTATGCACACAACTTGAC                                                                                         |
| IL-10         | F | GTTGCCAAGCCTTATCGGAA                                                                                          |
|               | R | TGATTTCTGGGCCATGCTTCT                                                                                         |
| TGF- $\beta$  | F | GGACTCTCCACCTGCAAGAC                                                                                          |
|               | R | CTGGCGAGCCTTAGTTTGGG                                                                                          |
| SCF           | F | ACTCTGTCTTGAGGCTGCATGTAA                                                                                      |
|               | R | AAAGAAGAGCAGCCACCATGTAC                                                                                       |
| NSE           | F | CTGCCCTGACCTGCCATAGT                                                                                          |
|               | R | GAACAGCAGGAGCGGTGAGT                                                                                          |

**Supplementary Table 2. Antibody information.**

| Gene          | Company     | Cat No.    | Dilution | Secondary antibody    |
|---------------|-------------|------------|----------|-----------------------|
| GAPDH         | Abcam       | ab181603   | 1:5000   | Anti-rabbit from goat |
| M-CSF         | Abcam       | ab233387   | 1:5000   | Anti-rabbit from goat |
| SCF           | Proteintech | 26582-1-AP | 1:1000   | Anti-rabbit from goat |
| NSE           | Proteintech | 10149-1-AP | 1:1000   | Anti-rabbit from goat |
| p38 MAPK      | Proteintech | 14064-1-AP | 1:1000   | Anti-rabbit from goat |
| IL-6          | Proteintech | 21865-1-AP | 1:1000   | Anti-rabbit from goat |
| TNF- $\alpha$ | Proteintech | 17590-1-AP | 1:1000   | Anti-rabbit from goat |
